# Supplementary material for: Distribution of branched glycerol dialkyl glycerol tetraethers in surface soils of the Qinghai–Tibetan Plateau: implications of brGDGTs-based proxies in cold and dry regions
Source: Copernicus journal article supplement (doi:10.5194/bg-12-3141-2015), 2015-06-01
Supplement: Supplementary file 1 [file bg-12-3141-2015-supplement.zip]

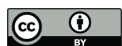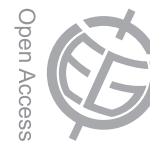

## *Supplement of*

# **Distribution of branched glycerol dialkyl glycerol tetraethers in surface soils of the Qinghai–Tibetan Plateau: implications of brGDGTs-based proxies in cold and dry regions**

**S. Ding et al.**

*Correspondence to:* Y. Xu (yunpingxu@pku.edu.cn)

- [bg-12-3141-2015-supplement-cover-letter.pdf](#)
- [Table S1.docx](#)
- [Table S2.docx](#)

The copyright of individual parts of the supplement might differ from the CC-BY 3.0 licence.
